# Supplementary material for: Triptolide as a novel agent in pancreatic cancer: the validation using patient derived pancreatic tumor cell line
Source: BMC Cancer. 2018 Nov 12;18:1103. doi: 10.1186/s12885-018-4995-0 (PMC6233492; doi:10.1186/s12885-018-4995-0)
Supplement: Supplementary file 1 — Table S1. Top 20 genes upregulated in sensitive cell lines to triptolide. (XLSX 10 kb) [file 12885_2018_4995_MOESM1_ESM.xlsx]

## Sheet: Sheet1
Additional file 1: Table S1. Top 20 genes upregulated in sensitive cell lines to triptolide
	Gene	Fold Change
1	RARRES1	7.69591
2	AGR3	6.76688
3	PROM1	6.21577
4	VGLL1	5.27118
5	UBD	4.57722
6	LRRN1	4.4959
7	C3	4.34142
8	GJB6	4.10226
9	LCN2	3.97676
10	MACC1	3.94056
11	PLAT	3.7975
12	RPL39L	3.72407
13	DDX43	3.70988
14	ST6GALNAC5	3.68711
15	GATM	3.68398
16	SORBS2	3.6357
17	PEG10	3.61742
18	ENPP5	3.56327
19	WFDC2	3.52353
20	C15orf48	3.43076
21	LOC100506098	3.40473
22	IL8	3.39285
23	CXCL1	3.34314
24	CXCL3	3.34228
25	BCAT1	3.33792
26	PTGS2	3.32786
27	TMEM71	3.28132
28	ACOT4	3.24473
29	GPR87	3.23131
30	VWA5A	1.96396
